# Supplementary material
Source: PubMed Central journal article supplement (PMC3366097)
Supplement: Supp_Data.pdf [file Supp_Data.pdf]

## Supplementary Data

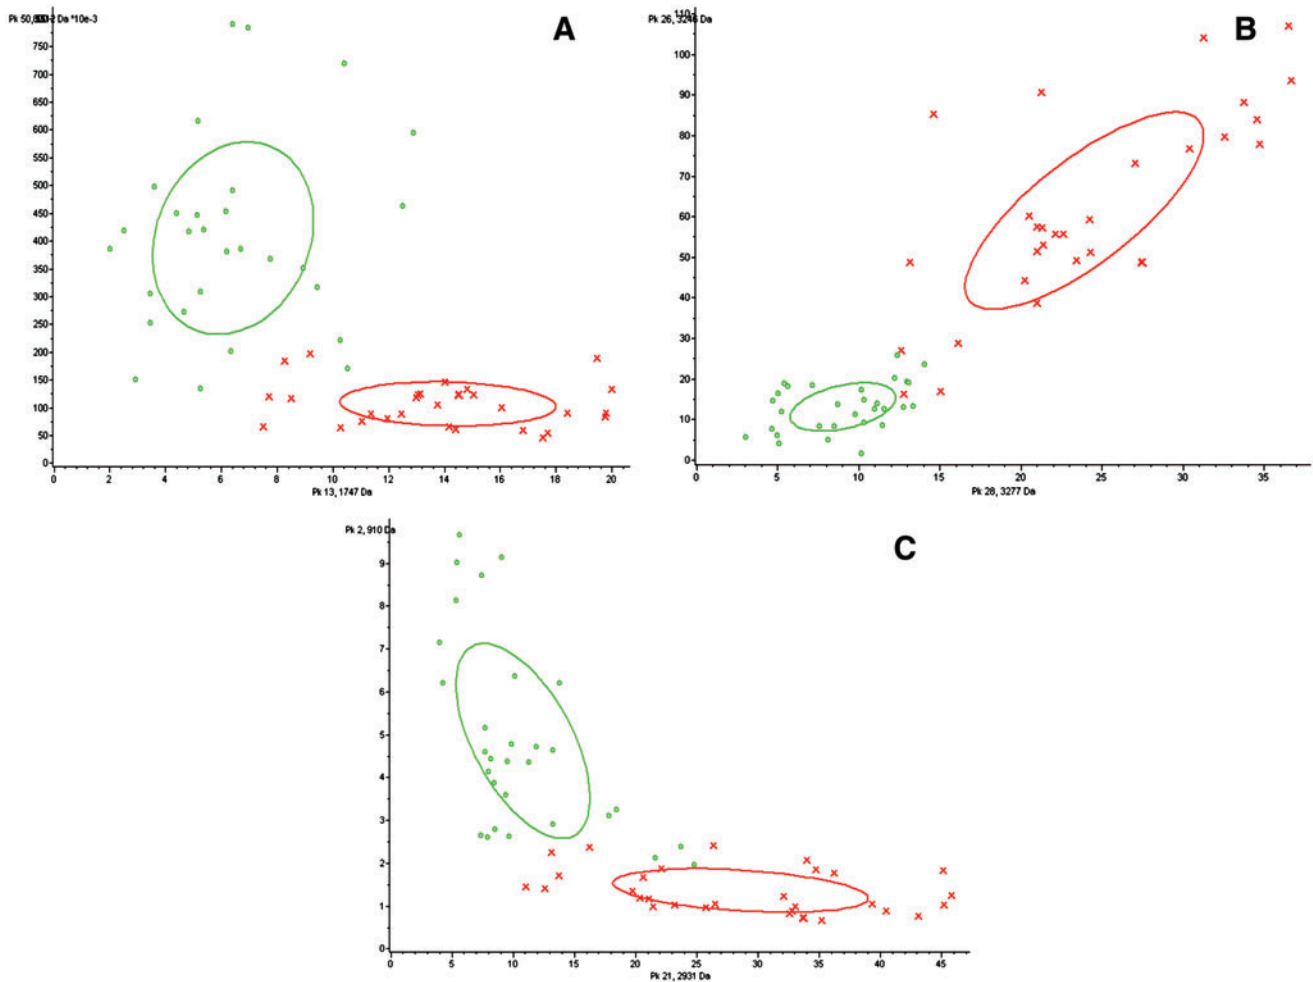

**SUPPLEMENTARY FIG. S1.** The distribution chart of *T. gondii* infection sample III and control samples (red: control; green: *T. gondii* infection). The coordinates represent the related protein intensities, and the large ellipses represent the standard deviations of the peak area class average. The small ellipses show that the protein peaks selected could distinguish *T. gondii* infection from controls. **(A)** Sample distribution of serum pretreated with MB-IMAC-Cu (2931 Da on the x axis, and 3246 Da on the y axis). **(B)** Sample distribution of serum pretreated with MB-HIC8 (3277 Da on the x axis and 3246 Da on the y axis). **(C)** Sample distribution of serum pretreated with MB-WCX (1747 Da on the x axis and 5512 Da on the y axis).
